# Supplementary material for: Preliminary Report on the Acquisition, Persistence, and Potential Transmission of Citrus tristeza virus by Diaphorina citri
Source: Insects. 2021 Aug 17;12(8):735. doi: 10.3390/insects12080735 (PMC8396932; doi:10.3390/insects12080735)
Supplement: Supplementary file 1 [file insects-12-00735-s001.zip › Supplementary data.xlsx]

## Sheet: Supplementary data of Figures
Figure 3. Persistence period of Citrus tristeza virus (CTV) in Diaphorina citri on different host plant species, as detected by RT-qPCR.
(A) Incidence of CTV-positive D. citri
0 d after AAP on "Shatangju" mandarin	100	100	100	90	70	70	80	70
5 d after AAP on "Shatangju" mandarin	70	50	50	70	80	90	90	70	80	70	80	70
15 d after AAP on "Shatangju" mandarin	90	50	40	80	40	70	100	50
5 d after AAP on orange jasmine	50	70	40	10	20	30	20	20
15 d after AAP on orange jasmine	10	0	20	0	0	10	0	0
(B) Box plots of obtained relative titers of CTV in total extracted cDNA
0 d after AAP on "Shatangju" mandarin	24045.8	33964.3	10459.1	31956.9	4246.03	25221.2	3841.03	9272.96	22259.9	15584.2	7183.79	2896.44	3171.75	1329.72	1878.73	491.974	7070.34	817.52	701.823	2443.16	966.047	226.482	23748.1	848.081	2338.36	7380.71	17184.9	17503.6	5708.84	27704.6	9771.8	29233.2	875.035	59184.3	496.512	774.275	10550.1	8152.64	23046.9	7654.74	48752	34409.3	2300.14	5713.98	8808.33	7690.67	4144.65	7794.04	3132.12
5 d after AAP on "Shatangju" mandarin	2900.8	4424.63	6979.95	9778.85	5480.93	2918.22	13690.3	12977.3	2219.64	9166.07	10051.6	4413.4	4456.46	3607.14	9970.33	6514.29	2526.09	1803.82	8258.49	5992.19	9979.98	9504.24	7426.83	16240.3	20101.8	5568.25	10255.2	6877.22	4987.99	3658.58	8225.36	8744.15	6856	6445.08	6899.36	5785.14	9875.36	12336.1	10545.2	9845.12	4588.25	7896.35	8975.06	10254.9	6584.55	9786.54	6458.25	8952.25	13578.1
15 d after AAP on "Shatangju" mandarin	1951.15	4888.59	3879.21	8037.7	4724.92	6827.84	1500.21	7126.27	1739.22	966.841	2376.85	36616.3	2790.39	15464.9	4169.26	42202	684.946	4673.18	4413.86	9266.46	960.865	1422.34	1280.77	10638.3	306.094	5966.86	4342.44	507.176	1542.71	1020.48	2804.61	1383.78	4242.94	685.802	2250.13	3368.91	2286.32	16252.9	3387.99	846.557	15934.4	4813.16	254.537	5745.03	904.391	15162.2	20832.7	43506.4	11525
5 d after AAP on orange jasmine	216.244	2256.88	543.871	591.108	474.821	1208.96	993.614	2591.67	132.933	1795.62	2664.07	47.1724	534.005	837.09	1524.79	85.0223	1862.86	1898.34	610.645	774.35	785.089	2943.93	1025.36	1955.11	788.36	986.32
15 d after AAP on orange jasmine	156.354	98.57	287.559	103.655
Figure 4. Incidence (A) and relative titers (B) of Citrus tristeza virus (CTV) in three host species after 5-day inoculation access period (IAP) upon exposure to CTV-positive Diaphorina citri.
(A) % of CTV-positive plants
Days after exposure to CTV-positive D. citri	"Shatangju" mandarin	"Eureka" lemon	orange jasmine
0	0	0	0
15	0	0	0
30	33.3333	0	0
45	41.6667	33.3333	0
60	50	50	0
75	50	66.6667	0
90	58.3333	83.33	0
120	58.3333	83.3333	0
210	58.3333	83.3333	0
(B) CTV titer of infected plants
Days after exposure to CTV-positive D. citri	"Shatangju" mandarin
0	-	-	-	-	-	-	-
15	-	-	-	-	-	-	-
30	159.606	55.56	40.2042	70.4247	-	-	-
45	139.06	223.934	310.928	510.911	24.0185	-	-
60	295.79	54.881	517.502	935.557	130.22	1137.11	-
75	587.85	254.501	919.252	856.54	518.689	1668.56	-
90	965.54	1544.23	31.58	54.6198	158.46	3159.37	3812.6
120	1233.21	1435.24	2445.33	876.3	1322.45	5443.2	3321.23
210	3324.24	2454.35	4213.23	2432.34	1455.53	2345.51	2190.23
Days after exposure to CTV-positive D. citri	"Eureka" lemon
0	0
15	0
30	0
45	21.5701	13
60	15.9	13.72	5.2968
75	15.2968	12.29	9.68	9.6802
90	21.5701	18.373	6.892	13.9994	57.0111
120	35.11	28.73	12.21	23.943	77.35
210	57.11	32.12	36.23	39.43	79.04
Days after exposure to CTV-positive D. citri	orange jasmine
0	0
15	0
30	0
45	0
60	0
75	0
90	0
120	0
210	0
[truncated: 38 more columns]
